# Supplementary material for: Rapid and sensitive detection of SARS-CoV-2 infection using quantitative peptide enrichment LC-MS analysis
Source: eLife journal article supplement (doi:10.7554/elife.70843), 2021-11-04

AYNVTQAFGR

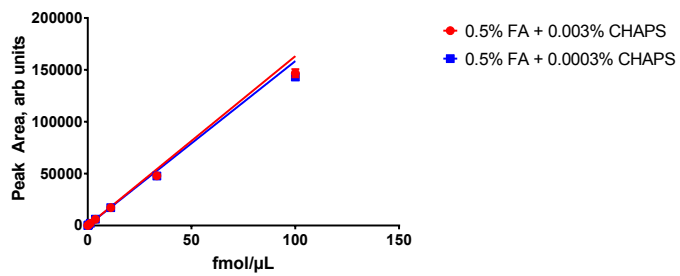

ADETQALPQR

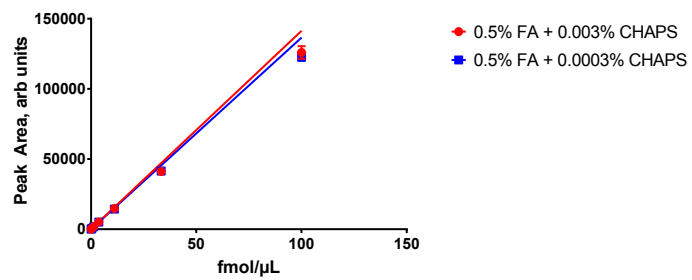

DGIWVATEGALNTPK

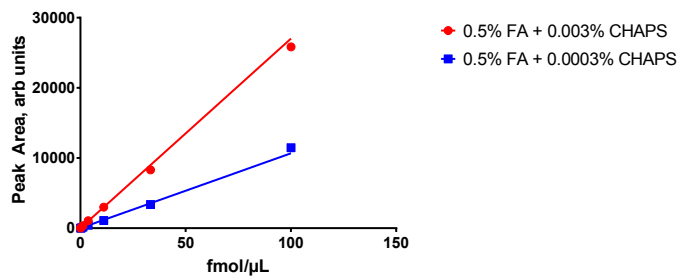

ITFGGPDSTGSNQNGER

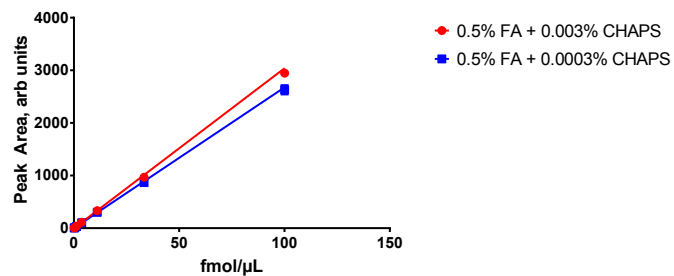

NPANNAAIVLQLPQGTTLPK

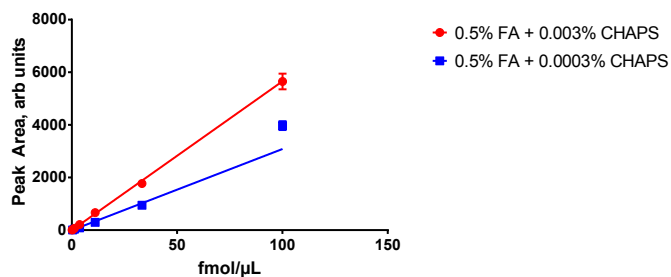

GQGVPIINTNSSPDQIGYYR

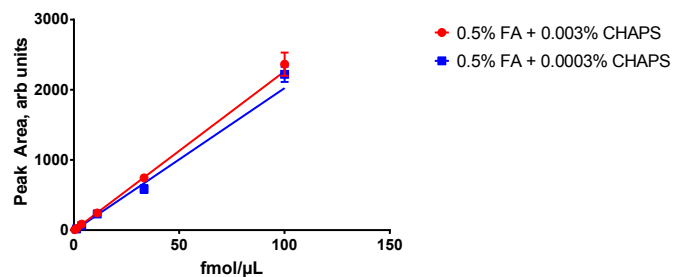

WFYYLTGTGPEAGLPYGANK

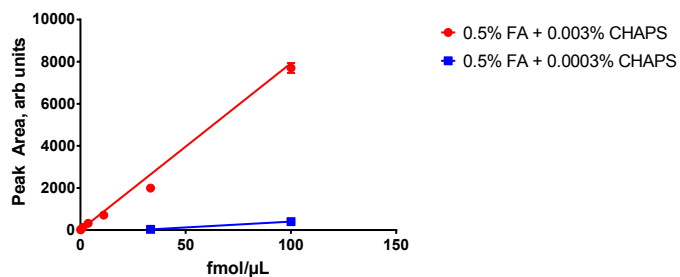

Supplement: supp [file elife-70843-supp-v1.zip]
